# Supplementary material
Source: publisher site journal article supplement (https://www.degruyterbrill.com/publication/isbn/9783486599619/downloadAsset/9783486599619_Errata.pdf)
Supplement: Supplementary file 1 [file 9783486599619_Errata.pdf]

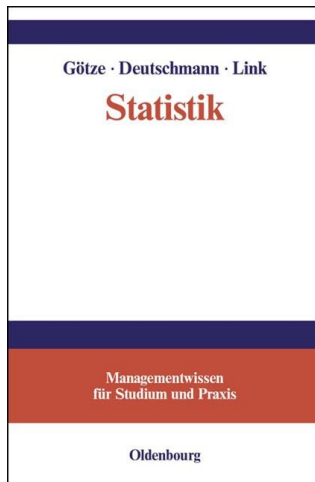

Wolfgang Götze

## Statistik

Lehr- und Übungsbuch mit Beispielen  
aus der Tourismus- und Verkehrswirtschaft

ISBN 978-3-486-27233-8

Reihe Managementwissen für Studium und Praxis

Oldenbourg Wissenschaftsverlag 2002

## Errata

- S. 24 Bsp. 1.3.1 Das ausreißerbereinigte arithmetische Mittel beträgt 29,22 Euro.
- S. 34  $s^2 = 333$   $s_b^2 = ((18 - 29,22)^2 + (22 - 29,22)^2 + \dots + (45 - 29,22)^2) / 9 = 58,40$   
 $s_*^2 = 396$
- S. 35  $s_{**}^2 = 396 - 30^2/12 = 321$
- S. 36 Bsp. 1.3.1  $s = 18,2$   $s_b = 7,6$   $s_{**} = 17,9$   $[34,8 - 2 \cdot 18,2 ; 34,8 - 2 \cdot 18,2] = [-1,6 ; 71,2]$
- S. 54  $H'_1 = \frac{H_1}{n_2}$  und  $H'_2 = \frac{H_2}{n_1}$
- S. 72 Aufgabe 1.6.4  $I_{96,95} = 96,3$
- S. 82 Aufgabe 1.7.2 Zusatzbedingung: 8 blaue Kombis weniger als grüne.
- S. 99 Vertauschen der Merkmalsbezeichnungen im Kopf der zweiten Tabelle
- S. 100 Vertauschen Tabellenkopf Dauer und Gewichtsverlust
- S. 140 siehe Aufgabe 2.2.2
- S. 163 Aufgabe 2.3.1 dass im Mittel 1/3 mehr Patienten (innen) anzusprechen sind.
- S. 176  $\bar{X}_n = \frac{1}{n}(X_1 + \dots + X_n) \sim N.V. \left( \cdot \mu, \frac{\sigma^2}{n} \right)$
- S. 177  $\frac{\bar{X}_n - \mu}{\sigma / \sqrt{n}} \sim N.V.(0,1).$
- S. 211 Die Nullhypothese  $H_0: \Theta_1 \leq \Theta_2$  bzw.  $\Theta_1 \geq \Theta_2$  wird abgelehnt, falls gilt  
 $t > C_{1-\alpha}$  bzw.  $t < C_\alpha$ . Die Nullhypothese  $H_0$  wird beibehalten, falls  
 $t \leq C_{1-\alpha}$  bzw.  $C_\alpha \leq t$ .
- S. 215 Dabei ist zu beachten, dass eine Ablehnung der Gleichheit des Durchschnittsalters mit einer Wahrscheinlichkeit von  $\alpha < 0,05$  falsch ist.

- S. 237      einer standardisierten Batterie von 7-stufigen bipolaren Rating-Skalen
- S. 293       $F_{(1 - 0,05; 4,47)} = 2,61$
- S. 297      durch linearisierende Trasformationen des Regressanden und/oder der Regressoren...
- S. 314      Da sich die Kommunalität  $h_j^2$  der j-ten Variablen aus der Summe der Quadrate ihrer Faktorladungen zusammensetzt, berechnet sich die Kommunalität mit:  

$$h_j^2 = \lambda_1 \cdot e_{j1}^2 + \dots + \lambda_r \cdot e_{jr}^2.$$
- S. 320      standardisierter Variablenwert  $z_{kj}$
- S.335      so stimmen die Werte von 8 Dummy-Variablen dennoch überein.
- S. 371      Cox/Snell  $R_{CS}^2 = 1 - \left( \frac{L(0)}{L_a} \right)^{\frac{2}{n}}$
- S. 371      Nagelkerke  $\max(R_{CS}^2) = 1 - (L(0))^{\frac{2}{n}}$
- S. 398      Aufgabe 1.2.2 h) Median 4,0 Aufgabe 1.2.3 d) Modus 2
- S. 408       $P(4 \leq Y \leq 8) = 0,7339$
- S. 409      Aufgabe 2.4.1 c) 0,0314 d) 507,98 Aufgabe 2.4.2 d) [8,5 °C; 15,5°C]
- S. 438      Vertauschen von FG1 und FG2 im Tabellenkopf
